# Supplementary material
Source: publisher figshare collection journal article supplement (https://sage.figshare.com/ndownloader/files/12419618)
Supplement: Supplementary file 1 [file 12419618]

Supplementary Table. Correlation between gender and cut-off percentages of tall cells in papillary thyroid carcinoma

|                     | Groups | Male | Female | Total      | P Value |
|---------------------|--------|------|--------|------------|---------|
| 10% TC<br>Threshold | < 10%  | 7    | 18     | 25 (38.5%) | 1.000   |
|                     | ≥ 10%  | 11   | 29     | 40 (61.5%) |         |
| 30% TC<br>Threshold | < 30%  | 12   | 28     | 40 (61.5%) | 0.777   |
|                     | ≥ 30%  | 6    | 19     | 25 (38.5%) |         |
| 50% TC<br>Threshold | < 50%  | 13   | 32     | 45 (69.2%) | 1.000   |
|                     | ≥ 50%  | 5    | 15     | 20 (30.8%) |         |
| 70% TC<br>Threshold | < 70%  | 16   | 37     | 53 (81.5%) | 0.485   |
|                     | ≥ 70%  | 2    | 10     | 12 (18.5%) |         |

TC score and extra-thyroidal extensions
